# Supplementary material
Source: PubMed Central journal article supplement (PMC4410085)
Supplement: NIHMS676588-supplement.pdf [file NIHMS676588-supplement.pdf]

**The Design, Synthesis and Biological Evaluation of Conformationally Restricted 4-Substituted-2,6-dimethylfuro[2,3-d]pyrimidines as Multi-targeted Receptor Tyrosine Kinase and Microtubule Inhibitors as Potential Antitumor Agents**

Xin Zhang, Sudhir Raghavan, Michael Ihnat, Ernest Hamel, Cynthia Zammiello, Anja Bastian, Susan L. Mooberry, Aleem Gangjee

**Supporting Information**

Elemental Analysis

## Elemental Analysis

| Compd | Formula                            | Calcd, % |      |       | Found, % |      |       |
|-------|------------------------------------|----------|------|-------|----------|------|-------|
|       |                                    | C        | H    | N     | C        | H    | N     |
| 2     | $C_{17}H_{19}N_3O$                 | 65.16    | 6.11 | 13.41 | 65.20    | 6.16 | 13.21 |
| 3     | $C_{17}H_{19}N_3O_3$               | 65.16    | 6.11 | 13.41 | 65.11    | 6.23 | 13.17 |
| 4     | $C_{18}H_{21}N_3O_4$               | 62.96    | 6.16 | 12.24 | 63.18    | 6.16 | 12.14 |
| 5     | $C_{16}H_{15}N_3O_3$               | 69.64    | 5.09 | 14.13 | 64.63    | 4.98 | 14.14 |
| 6     | $C_{17}H_{17}N_3O_2$               | 69.14    | 5.80 | 14.23 | 68.97    | 5.88 | 14.12 |
| 7     | $C_{17}H_{15}N_3O_2$               | 69.61    | 5.15 | 14.33 | 69.54    | 5.17 | 14.21 |
| 8     | $C_{17}H_{17}N_3O_2$               | 69.14    | 5.80 | 14.23 | 69.17    | 5.78 | 14.22 |
| 9     | $C_{17}H_{15}N_3O_2$               | 69.61    | 5.15 | 14.33 | 69.62    | 5.15 | 14.35 |
| 10    | $C_{18}H_{19}N_3O_2$               | 69.88    | 6.19 | 13.58 | 69.85    | 6.21 | 13.56 |
| 11    | $C_{18}H_{21}N_3O_2$               | 69.43    | 6.80 | 13.49 | 69.42    | 6.82 | 13.43 |
| 12    | $C_{17}H_{19}N_3O_2$               | 68.67    | 6.44 | 14.13 | 68.89    | 6.48 | 14.06 |
| 18    | $C_{16}H_{17}N_3O_3$               | 64.20    | 5.72 | 14.04 | 64.57    | 5.85 | 13.76 |
| 19    | $C_{16}H_{17}N_3O_3 \cdot H_2O$    | 60.56    | 6.03 | 13.24 | 60.67    | 6.15 | 13.03 |
| 20    | $C_{17}H_{19}N_3O_4 \cdot 0.2H_2O$ | 61.32    | 5.87 | 12.62 | 16.41    | 5.94 | 12.30 |
| 21    | $C_{15}H_{13}N_3O_2$               | 63.60    | 4.63 | 14.83 | 63.54    | 4.56 | 14.90 |
| 22    | $C_{16}H_{15}N_3O_2$               | 68.31    | 5.37 | 14.94 | 68.39    | 5.78 | 14.01 |
| 23    | $C_{16}H_{13}N_3O_2$               | 68.81    | 4.69 | 15.05 | 68.84    | 4.77 | 14.96 |
| 24    | $C_{16}H_{17}N_3O_2$               | 67.83    | 6.05 | 14.83 | 67.81    | 6.08 | 14.71 |
| 25    | $C_{17}H_{19}N_3O_2$               | 68.67    | 6.44 | 14.13 | 68.52    | 6.53 | 14.06 |
